# Supplementary material
Source: publisher figshare collection journal article supplement (https://acs.figshare.com/ndownloader/files/5061727)
Supplement: Supplementary file 1 [file 5061727]

  
data_CC 
  
_audit_creation_method            SHELXL-97 
_chemical_name_systematic 
; 
 ? 
; 
_chemical_name_common             ? 
_chemical_melting_point           ? 
_chemical_formula_moiety          ? 
_chemical_formula_sum 
 'C107 H90.50 Ag Cl9.50 F7.50 N4 O9.50 P4 Ru2 S2.50' 
_chemical_formula_weight          2577.65 
  
loop_ 
 _atom_type_symbol 
 _atom_type_description 
 _atom_type_scat_dispersion_real 
 _atom_type_scat_dispersion_imag 
 _atom_type_scat_source 
 'C'  'C'   0.0033   0.0016 
 'International Tables Vol C Tables 4.2.6.8 and 6.1.1.4' 
 'H'  'H'   0.0000   0.0000 
 'International Tables Vol C Tables 4.2.6.8 and 6.1.1.4' 
 'N'  'N'   0.0061   0.0033 
 'International Tables Vol C Tables 4.2.6.8 and 6.1.1.4' 
 'O'  'O'   0.0106   0.0060 
 'International Tables Vol C Tables 4.2.6.8 and 6.1.1.4' 
 'F'  'F'   0.0171   0.0103 
 'International Tables Vol C Tables 4.2.6.8 and 6.1.1.4' 
 'P'  'P'   0.1023   0.0942 
 'International Tables Vol C Tables 4.2.6.8 and 6.1.1.4' 
 'S'  'S'   0.1246   0.1234 
 'International Tables Vol C Tables 4.2.6.8 and 6.1.1.4' 
 'Cl'  'Cl'   0.1484   0.1585 
 'International Tables Vol C Tables 4.2.6.8 and 6.1.1.4' 
 'Ru'  'Ru'  -1.2594   0.8363 
 'International Tables Vol C Tables 4.2.6.8 and 6.1.1.4' 
 'Ag'  'Ag'  -0.8971   1.1015 
 'International Tables Vol C Tables 4.2.6.8 and 6.1.1.4' 
  
_symmetry_cell_setting            Orthorhombic 
_symmetry_space_group_name_H-M    P2(1)2(1)2 
  
loop_ 
 _symmetry_equiv_pos_as_xyz 
 'x, y, z' 
 '-x, -y, z' 
 '-x+1/2, y+1/2, -z' 
 'x+1/2, -y+1/2, -z' 
  
_cell_length_a                    20.9715(16) 
_cell_length_b                    39.437(3) 
_cell_length_c                    13.8177(10) 
_cell_angle_alpha                 90.00 
_cell_angle_beta                  90.00 
_cell_angle_gamma                 90.00 
_cell_volume                      11428.0(15) 
_cell_formula_units_Z             4 
_cell_measurement_temperature     90
_cell_measurement_reflns_used     8839 
_cell_measurement_theta_min       2.28 
_cell_measurement_theta_max       27.85 
  
_exptl_crystal_description        block
_exptl_crystal_colour             'pale yellow'
_exptl_crystal_size_max           0.29 
_exptl_crystal_size_mid           0.27 
_exptl_crystal_size_min           0.13 
_exptl_crystal_density_meas       0 
_exptl_crystal_density_diffrn     1.498 
_exptl_crystal_density_method     'not measured' 
_exptl_crystal_F_000              5202 
_exptl_absorpt_coefficient_mu     0.823 
_exptl_absorpt_correction_type    empirical
_exptl_absorpt_correction_T_min   0.7963 
_exptl_absorpt_correction_T_max   0.9006 
_exptl_absorpt_process_details    
;
SADABS Sheldrick 1996
;
  
_exptl_special_details 
; 
 ? 
; 
  
_diffrn_ambient_temperature       90
_diffrn_radiation_wavelength      0.71073 
_diffrn_radiation_type            MoK\a 
_diffrn_radiation_source          'fine-focus sealed tube' 
_diffrn_radiation_monochromator   graphite 
_diffrn_measurement_device_type   'CCD area detector' 
_diffrn_measurement_method        'phi and omega scans' 
_diffrn_detector_area_resol_mean  8.366
_diffrn_standards_number          ? 
_diffrn_standards_interval_count  ? 
_diffrn_standards_interval_time   ? 
_diffrn_standards_decay_%         ? 
_diffrn_reflns_number             135463 
_diffrn_reflns_av_R_equivalents   0.0511 
_diffrn_reflns_av_sigmaI/netI     0.0432 
_diffrn_reflns_limit_h_min        -27 
_diffrn_reflns_limit_h_max        26 
_diffrn_reflns_limit_k_min        -51 
_diffrn_reflns_limit_k_max        50 
_diffrn_reflns_limit_l_min        -18 
_diffrn_reflns_limit_l_max        18 
_diffrn_reflns_theta_min          1.47 
_diffrn_reflns_theta_max          27.93 
_reflns_number_total              26825 
_reflns_number_gt                 24521 
_reflns_threshold_expression      >2sigma(I) 
  
_computing_data_collection        'Bruker SMART' 
_computing_cell_refinement        'Bruker SMART' 
_computing_data_reduction         'Bruker SAINT' 
_computing_structure_solution     'SHELXS-97 (Sheldrick, 1990)' 
_computing_structure_refinement   'SHELXL-97 (Sheldrick, 1997)' 
_computing_molecular_graphics     'Bruker SHELXTL' 
_computing_publication_material   'Bruker SHELXTL' 
  
_refine_special_details 
; 
 Refinement of F^2^ against ALL reflections.  The weighted R-factor wR and 
 goodness of fit S are based on F^2^, conventional R-factors R are based 
 on F, with F set to zero for negative F^2^. The threshold expression of 
 F^2^ > 2sigma(F^2^) is used only for calculating R-factors(gt) etc. and is 
 not relevant to the choice of reflections for refinement.  R-factors based 
 on F^2^ are statistically about twice as large as those based on F, and R- 
 factors based on ALL data will be even larger. 
; 
  
_refine_ls_structure_factor_coef  Fsqd 
_refine_ls_matrix_type            full 
_refine_ls_weighting_scheme       calc 
_refine_ls_weighting_details 
 'calc w=1/[\s^2^(Fo^2^)+(0.1126P)^2^+55.0952P] where P=(Fo^2^+2Fc^2^)/3' 
_atom_sites_solution_primary      direct 
_atom_sites_solution_secondary    difmap 
_atom_sites_solution_hydrogens    geom 
_refine_ls_hydrogen_treatment     mixed 
_refine_ls_extinction_method      none 
_refine_ls_extinction_coef        ? 
_refine_ls_abs_structure_details 
 'Flack H D (1983), Acta Cryst. A39, 876-881' 
_refine_ls_abs_structure_Flack    0.04(3) 
_refine_ls_number_reflns          26825 
_refine_ls_number_parameters      1448 
_refine_ls_number_restraints      2307 
_refine_ls_R_factor_all           0.0821 
_refine_ls_R_factor_gt            0.0754 
_refine_ls_wR_factor_ref          0.2145 
_refine_ls_wR_factor_gt           0.2099 
_refine_ls_goodness_of_fit_ref    1.145 
_refine_ls_restrained_S_all       1.117 
_refine_ls_shift/su_max           0.030 
_refine_ls_shift/su_mean          0.001 
  
loop_ 
 _atom_site_label 
 _atom_site_type_symbol 
 _atom_site_fract_x 
 _atom_site_fract_y 
 _atom_site_fract_z 
 _atom_site_U_iso_or_equiv 
 _atom_site_adp_type 
 _atom_site_occupancy 
 _atom_site_symmetry_multiplicity 
 _atom_site_calc_flag 
 _atom_site_refinement_flags 
 _atom_site_disorder_assembly 
 _atom_site_disorder_group 
Ag1 Ag 0.25729(3) 0.766858(15) 0.32051(4) 0.02607(13) Uani 1 1 d U . . 
C7 C 0.3783(4) 0.9021(2) 0.3146(6) 0.0334(16) Uani 1 1 d U . . 
C16 C 0.3477(4) 0.61167(18) 0.2536(6) 0.0275(14) Uani 1 1 d U . . 
C17 C 0.2023(3) 0.67060(19) 0.3984(6) 0.0254(14) Uani 1 1 d U . . 
H17A H 0.1940 0.6939 0.4239 0.030 Uiso 1 1 calc R . . 
C18 C 0.2665(5) 0.91813(18) 0.1101(5) 0.0307(16) Uani 1 1 d U . . 
C19 C 0.3637(3) 0.6776(2) -0.0689(6) 0.0292(15) Uani 1 1 d U . . 
H19A H 0.3788 0.6550 -0.0766 0.035 Uiso 1 1 calc R . . 
C20 C 0.4508(4) 0.6281(2) 0.3268(6) 0.0310(15) Uani 1 1 d U . . 
C21 C 0.1843(4) 0.80248(19) 0.0010(5) 0.0259(14) Uani 1 1 d U . . 
H21A H 0.1763 0.8073 0.0673 0.031 Uiso 1 1 calc R . . 
C23 C 0.3841(4) 0.8823(3) 0.3972(6) 0.0349(17) Uani 1 1 d U . . 
H23A H 0.3926 0.8587 0.3910 0.042 Uiso 1 1 calc R . . 
C27 C 0.4714(3) 0.6646(2) 0.1403(6) 0.0289(15) Uani 1 1 d U . . 
C28 C 0.1835(3) 0.86110(18) 0.3564(5) 0.0217(13) Uani 1 1 d U . . 
H28A H 0.1744 0.8363 0.3604 0.026 Uiso 1 1 calc R . . 
C30 C 0.2371(4) 0.81550(19) -0.1473(5) 0.0248(14) Uani 1 1 d U . . 
H30A H 0.2657 0.8294 -0.1831 0.030 Uiso 1 1 calc R . . 
C34 C 0.3230(3) 0.68605(18) 0.0074(5) 0.0231(13) Uani 1 1 d U . . 
C35 C 0.1666(3) 0.7677(2) -0.1364(5) 0.0276(15) Uani 1 1 d U . . 
H35A H 0.1470 0.7486 -0.1656 0.033 Uiso 1 1 calc R . . 
C36 C 0.0699(4) 0.8713(2) 0.2958(6) 0.0313(16) Uani 1 1 d U . . 
C37 C 0.2250(3) 0.82272(18) -0.0506(5) 0.0214(13) Uani 1 1 d U . . 
C38 C 0.1544(4) 0.7746(2) -0.0436(6) 0.0273(15) Uani 1 1 d U . . 
H38A H 0.1258 0.7608 -0.0079 0.033 Uiso 1 1 calc R . . 
C39 C 0.4341(4) 0.8393(2) -0.1188(7) 0.0386(18) Uani 1 1 d U . . 
H39A H 0.4648 0.8217 -0.1136 0.046 Uiso 1 1 calc R . . 
C40 C 0.2574(3) 0.6544(2) 0.4556(5) 0.0257(14) Uani 1 1 d U . . 
H40A H 0.2585 0.6297 0.4396 0.031 Uiso 1 1 calc R . . 
C42 C 0.4407(4) 0.8192(2) 0.1825(7) 0.0386(18) Uani 1 1 d U . . 
H42A H 0.4032 0.8096 0.1551 0.046 Uiso 1 1 calc R . . 
C44 C 0.1761(3) 0.87586(19) 0.4564(5) 0.0233(13) Uani 1 1 d U . . 
C45 C 0.2497(4) 0.6578(2) 0.5639(6) 0.0314(16) Uani 1 1 d U . . 
C46 C 0.2481(5) 0.6890(3) 0.6104(7) 0.051(2) Uani 1 1 d U . . 
H46A H 0.2524 0.7092 0.5734 0.061 Uiso 1 1 calc R . . 
C47 C 0.2096(4) 0.89511(19) -0.0289(5) 0.0258(14) Uani 1 1 d U . . 
C50 C 0.3295(4) 0.61487(19) 0.0707(6) 0.0274(15) Uani 1 1 d U . . 
C51 C 0.2075(4) 0.7880(2) -0.1919(5) 0.0301(16) Uani 1 1 d U . . 
H51A H 0.2149 0.7831 -0.2583 0.036 Uiso 1 1 calc R . . 
C52 C 0.3011(4) 0.7201(2) 0.0171(6) 0.0286(15) Uani 1 1 d U . . 
H52A H 0.2729 0.7260 0.0683 0.034 Uiso 1 1 calc R . . 
C53 C 0.4779(3) 0.6980(2) 0.3205(5) 0.0245(14) Uani 1 1 d U . . 
C54 C 0.3548(4) 0.59756(19) 0.1519(6) 0.0319(16) Uani 1 1 d U . . 
C55 C 0.2121(3) 0.6488(2) 0.0727(6) 0.0270(15) Uani 1 1 d U . . 
C56 C 0.4900(4) 0.6343(3) 0.0951(6) 0.0357(18) Uani 1 1 d U . . 
H56A H 0.4856 0.6133 0.1285 0.043 Uiso 1 1 calc R . . 
C57 C 0.1715(4) 0.8699(2) 0.6287(6) 0.0346(17) Uani 1 1 d U . . 
H57A H 0.1682 0.8555 0.6837 0.042 Uiso 1 1 calc R . . 
C58 C 0.3801(4) 0.8391(2) -0.0600(6) 0.0315(16) Uani 1 1 d U . . 
H58A H 0.3746 0.8219 -0.0126 0.038 Uiso 1 1 calc R . . 
C59 C 0.2406(5) 0.6911(3) 0.7090(8) 0.055(2) Uani 1 1 d U . . 
H59A H 0.2396 0.7128 0.7393 0.066 Uiso 1 1 calc R . . 
C60 C 0.4789(3) 0.6951(2) 0.0906(5) 0.0259(15) Uani 1 1 d U . . 
H60A H 0.4658 0.7157 0.1197 0.031 Uiso 1 1 calc R . . 
C61 C 0.3534(2) 0.80255(12) 0.6060(3) 0.043(2) Uani 1 1 d DU . . 
C62 C 0.1852(4) 0.6190(3) 0.1044(8) 0.045(2) Uani 1 1 d U . . 
H62A H 0.2104 0.6034 0.1402 0.054 Uiso 1 1 calc R . . 
C63 C 0.1624(4) 0.8952(2) -0.1008(5) 0.0282(15) Uani 1 1 d U . . 
H63A H 0.1581 0.8768 -0.1446 0.034 Uiso 1 1 calc R . . 
C64 C 0.4436(4) 0.8532(2) 0.2037(6) 0.0326(17) Uani 1 1 d U . . 
C66 C 0.1764(5) 0.9040(3) 0.6413(6) 0.0386(19) Uani 1 1 d U . . 
H66A H 0.1755 0.9137 0.7043 0.046 Uiso 1 1 calc R . . 
C67 C 0.5437(3) 0.6996(2) 0.3072(6) 0.0314(16) Uani 1 1 d U . . 
H67A H 0.5629 0.6870 0.2565 0.038 Uiso 1 1 calc R . . 
C68 C 0.4977(5) 0.5961(3) 0.4556(7) 0.046(2) Uani 1 1 d U . . 
H68A H 0.5304 0.5932 0.5024 0.056 Uiso 1 1 calc R . . 
C70 C 0.5145(4) 0.6347(3) 0.0021(7) 0.045(2) Uani 1 1 d U . . 
H70A H 0.5253 0.6140 -0.0289 0.054 Uiso 1 1 calc R . . 
C71 C 0.5058(4) 0.6953(3) -0.0029(6) 0.0377(18) Uani 1 1 d U . . 
H71A H 0.5120 0.7161 -0.0362 0.045 Uiso 1 1 calc R . . 
C72 C 0.2138(4) 0.9209(2) 0.0379(6) 0.0322(16) Uani 1 1 d U . . 
C73 C 0.1429(4) 0.6489(2) 0.4124(6) 0.0275(15) Uani 1 1 d U . . 
C74 C 0.1737(4) 0.6725(3) 0.0260(6) 0.0372(18) Uani 1 1 d U . . 
H74A H 0.1910 0.6939 0.0077 0.045 Uiso 1 1 calc R . . 
C75 C 0.0425(3) 0.73704(11) 0.2577(3) 0.041(2) Uani 1 1 d DU . . 
C76 C 0.1411(3) 0.87603(19) 0.2786(5) 0.0252(14) Uani 1 1 d U . . 
H76A H 0.1496 0.9010 0.2764 0.030 Uiso 1 1 calc R . . 
C78 C 0.0288(4) 0.8948(3) 0.2583(7) 0.0423(19) Uani 1 1 d U . . 
H78A H 0.0457 0.9141 0.2260 0.051 Uiso 1 1 calc R . . 
C79 C 0.3677(5) 0.9312(3) 0.4993(9) 0.055(2) Uani 1 1 d U . . 
H79A H 0.3625 0.9408 0.5618 0.066 Uiso 1 1 calc R . . 
C80 C 0.3715(5) 0.9368(3) 0.3245(8) 0.048(2) Uani 1 1 d U . . 
H80A H 0.3709 0.9508 0.2686 0.058 Uiso 1 1 calc R . . 
C81 C 0.1224(5) 0.6114(3) 0.0853(9) 0.056(2) Uani 1 1 d U . . 
H81A H 0.1045 0.5905 0.1065 0.067 Uiso 1 1 calc R . . 
C82 C -0.0613(5) 0.8632(3) 0.3167(8) 0.052(2) Uani 1 1 d U . . 
H82A H -0.1059 0.8604 0.3258 0.062 Uiso 1 1 calc R . . 
C84 C 0.3206(4) 0.7445(2) -0.0479(6) 0.0352(17) Uani 1 1 d U . . 
H84A H 0.3064 0.7672 -0.0406 0.042 Uiso 1 1 calc R . . 
C85 C 0.0836(5) 0.5972(3) 0.3808(8) 0.046(2) Uani 1 1 d U . . 
H85A H 0.0799 0.5757 0.3499 0.056 Uiso 1 1 calc R . . 
C86 C 0.3816(4) 0.7034(2) -0.1343(6) 0.0352(17) Uani 1 1 d U . . 
H86A H 0.4087 0.6978 -0.1870 0.042 Uiso 1 1 calc R . . 
C87 C 0.3592(6) 0.5686(2) -0.0317(7) 0.050(2) Uani 1 1 d U . . 
H87A H 0.3618 0.5587 -0.0942 0.060 Uiso 1 1 calc R . . 
C88 C 0.4425(4) 0.8651(3) -0.1846(7) 0.0415(19) Uani 1 1 d U . . 
H88A H 0.4800 0.8656 -0.2232 0.050 Uiso 1 1 calc R . . 
C90 C 0.3776(4) 0.8964(3) 0.4890(7) 0.0400(19) Uani 1 1 d U . . 
H90A H 0.3799 0.8824 0.5447 0.048 Uiso 1 1 calc R . . 
C91 C 0.5008(4) 0.6236(3) 0.3907(6) 0.0368(18) Uani 1 1 d U . . 
H91A H 0.5362 0.6386 0.3909 0.044 Uiso 1 1 calc R . . 
C92 C 0.1711(4) 0.8557(2) 0.5353(5) 0.0264(15) Uani 1 1 d U . . 
H92A H 0.1673 0.8318 0.5276 0.032 Uiso 1 1 calc R . . 
C94 C 0.4509(4) 0.7186(2) 0.3927(6) 0.0290(15) Uani 1 1 d U . . 
H94A H 0.4060 0.7189 0.4017 0.035 Uiso 1 1 calc R . . 
C95 C 0.4889(4) 0.7382(2) 0.4500(6) 0.0300(16) Uani 1 1 d U . . 
H95A H 0.4698 0.7519 0.4985 0.036 Uiso 1 1 calc R . . 
C96 C 0.1222(5) 0.9231(2) -0.1059(6) 0.0353(17) Uani 1 1 d U . . 
H96A H 0.0921 0.9248 -0.1571 0.042 Uiso 1 1 calc R . . 
C97 C 0.5811(4) 0.7191(2) 0.3658(6) 0.0321(17) Uani 1 1 d U . . 
H97A H 0.6260 0.7194 0.3563 0.039 Uiso 1 1 calc R . . 
C98 C 0.4003(4) 0.6049(2) 0.3239(6) 0.0291(15) Uani 1 1 d U . . 
C99 C 0.3614(4) 0.7360(3) -0.1245(7) 0.0395(19) Uani 1 1 d U . . 
H99A H 0.3749 0.7529 -0.1692 0.047 Uiso 1 1 calc R . . 
C100 C 0.3350(4) 0.86396(19) -0.0710(5) 0.0244(14) Uani 1 1 d U . . 
C101 C 0.2347(5) 0.6626(3) 0.7636(6) 0.050(2) Uani 1 1 d U . . 
H10A H 0.2300 0.6644 0.8317 0.060 Uiso 1 1 calc R . . 
C102 C 0.5541(4) 0.7388(2) 0.4398(6) 0.0350(17) Uani 1 1 d U . . 
H10B H 0.5800 0.7521 0.4816 0.042 Uiso 1 1 calc R . . 
C103 C 0.5232(4) 0.6649(3) -0.0455(6) 0.043(2) Uani 1 1 d U . . 
H10C H 0.5414 0.6650 -0.1085 0.052 Uiso 1 1 calc R . . 
C104 C 0.0448(4) 0.8436(2) 0.3417(7) 0.0376(19) Uani 1 1 d U . . 
H10D H 0.0721 0.8266 0.3669 0.045 Uiso 1 1 calc R . . 
C105 C 0.3424(4) 0.8892(2) -0.1381(7) 0.0356(18) Uani 1 1 d U . . 
H10E H 0.3100 0.9058 -0.1455 0.043 Uiso 1 1 calc R . . 
C106 C 0.5005(4) 0.8680(3) 0.2396(7) 0.045(2) Uani 1 1 d U . . 
H10F H 0.5034 0.8916 0.2531 0.054 Uiso 1 1 calc R . . 
C107 C 0.3656(6) 0.9515(3) 0.4175(8) 0.057(3) Uani 1 1 d U . . 
H10G H 0.3601 0.9753 0.4239 0.068 Uiso 1 1 calc R . . 
C110 C 0.3340(6) 0.9582(2) 0.0130(7) 0.045(2) Uani 1 1 d U . . 
H11A H 0.2963 0.9694 -0.0080 0.054 Uiso 1 1 calc R . . 
C111 C 0.0855(4) 0.6345(3) 0.0345(8) 0.053(2) Uani 1 1 d U . . 
H11B H 0.0425 0.6291 0.0191 0.064 Uiso 1 1 calc R . . 
C112 C 0.5526(4) 0.8462(3) 0.2541(8) 0.053(2) Uani 1 1 d U . . 
H11C H 0.5919 0.8557 0.2750 0.064 Uiso 1 1 calc R . . 
C113 C 0.0388(4) 0.6403(3) 0.4816(8) 0.048(2) Uani 1 1 d U . . 
H11D H 0.0041 0.6481 0.5197 0.057 Uiso 1 1 calc R . . 
C115 C 0.1712(5) 0.9479(2) 0.0338(7) 0.0382(19) Uani 1 1 d U . . 
H11E H 0.1738 0.9658 0.0797 0.046 Uiso 1 1 calc R . . 
C116 C 0.1816(4) 0.9109(2) 0.4675(6) 0.0330(16) Uani 1 1 d U . . 
H11F H 0.1845 0.9253 0.4124 0.040 Uiso 1 1 calc R . . 
C117 C 0.4483(6) 0.9525(3) 0.0089(8) 0.055(2) Uani 1 1 d U . . 
H11G H 0.4883 0.9599 -0.0155 0.066 Uiso 1 1 calc R . . 
C119 C -0.0211(4) 0.8406(3) 0.3512(8) 0.048(2) Uani 1 1 d U . . 
H11H H -0.0378 0.8214 0.3841 0.058 Uiso 1 1 calc R . . 
C120 C 0.0932(4) 0.6607(2) 0.4706(6) 0.0338(17) Uani 1 1 d U . . 
H12A H 0.0961 0.6821 0.5021 0.041 Uiso 1 1 calc R . . 
C121 C 0.1389(4) 0.6173(2) 0.3686(8) 0.042(2) Uani 1 1 d U . . 
H12B H 0.1734 0.6091 0.3305 0.050 Uiso 1 1 calc R . . 
C122 C 0.5492(5) 0.8125(3) 0.2399(8) 0.053(2) Uani 1 1 d U . . 
H12C H 0.5843 0.7982 0.2556 0.064 Uiso 1 1 calc R . . 
C124 C 0.1105(4) 0.6653(3) 0.0062(7) 0.048(2) Uani 1 1 d U . . 
H12D H 0.0846 0.6814 -0.0265 0.057 Uiso 1 1 calc R . . 
C128 C 0.2440(5) 0.6288(3) 0.6185(7) 0.045(2) Uani 1 1 d U . . 
H12E H 0.2459 0.6074 0.5872 0.053 Uiso 1 1 calc R . . 
C130 C 0.2354(6) 0.6300(3) 0.7193(7) 0.057(2) Uani 1 1 d U . . 
H13A H 0.2303 0.6099 0.7564 0.068 Uiso 1 1 calc R . . 
C132 C 0.3284(5) 0.5991(2) -0.0198(6) 0.0351(17) Uani 1 1 d U . . 
H13B H 0.3066 0.6093 -0.0725 0.042 Uiso 1 1 calc R . . 
C133 C 0.3828(6) 0.5664(2) 0.1357(8) 0.052(2) Uani 1 1 d U . . 
H13C H 0.4002 0.5545 0.1894 0.063 Uiso 1 1 calc R . . 
C134 C 0.3867(6) 0.5519(3) 0.0474(7) 0.054(2) Uani 1 1 d U . . 
H13D H 0.4078 0.5308 0.0391 0.065 Uiso 1 1 calc R . . 
C135 C 0.3990(5) 0.5772(2) 0.3874(6) 0.0392(19) Uani 1 1 d U . . 
H13E H 0.3646 0.5615 0.3853 0.047 Uiso 1 1 calc R . . 
C136 C 0.4471(5) 0.5730(3) 0.4519(8) 0.050(2) Uani 1 1 d U . . 
H13F H 0.4465 0.5542 0.4949 0.060 Uiso 1 1 calc R . . 
C137 C 0.3970(5) 0.8907(2) -0.1958(7) 0.041(2) Uani 1 1 d U . . 
H13G H 0.4030 0.9086 -0.2411 0.049 Uiso 1 1 calc R . . 
C138 C 0.3939(6) 0.9686(3) -0.0216(9) 0.057(3) Uani 1 1 d U . . 
H13H H 0.3968 0.9868 -0.0664 0.068 Uiso 1 1 calc R . . 
C139 C 0.4471(5) 0.9253(3) 0.0751(7) 0.046(2) Uani 1 1 d U . . 
H13I H 0.4853 0.9143 0.0947 0.055 Uiso 1 1 calc R . . 
C140 C 0.3878(5) 0.9153(2) 0.1109(6) 0.0374(18) Uani 1 1 d U . . 
C141 C 0.3304(5) 0.9307(2) 0.0804(6) 0.0380(18) Uani 1 1 d U . . 
C142 C 0.1254(5) 0.9484(2) -0.0370(7) 0.0403(19) Uani 1 1 d U . . 
H14A H 0.0954 0.9664 -0.0387 0.048 Uiso 1 1 calc R . . 
C143 C -0.0377(5) 0.8913(3) 0.2664(8) 0.054(2) Uani 1 1 d U . . 
H14B H -0.0657 0.9076 0.2386 0.065 Uiso 1 1 calc R . . 
C144 C 0.1828(5) 0.9245(2) 0.5601(7) 0.0408(19) Uani 1 1 d U . . 
H14C H 0.1882 0.9483 0.5681 0.049 Uiso 1 1 calc R . . 
C145 C 0.0353(5) 0.6094(3) 0.4381(9) 0.053(2) Uani 1 1 d U . . 
H14D H -0.0016 0.5958 0.4477 0.063 Uiso 1 1 calc R . . 
C146 C 0.4939(5) 0.7989(3) 0.2020(8) 0.050(2) Uani 1 1 d U . . 
H14E H 0.4919 0.7753 0.1889 0.060 Uiso 1 1 calc R . . 
C1U C 0.2662(8) 0.5270(2) 0.6620(8) 0.122(7) Uani 0.380(10) 1 d PDU A 2 
H1UA H 0.2274 0.5382 0.6893 0.147 Uiso 0.380(10) 1 calc PR A 2 
C1V C 0.3470(6) 0.51171(16) 0.6693(7) 0.116(6) Uani 0.620(10) 1 d PDU A 1 
H1VA H 0.3841 0.5101 0.7146 0.139 Uiso 0.620(10) 1 calc PR A 1 
C1T C 0.1990(5) 0.51029(11) 0.2446(5) 0.077(4) Uani 0.725(13) 1 d PDU B 3 
H1TA H 0.1516 0.5120 0.2390 0.092 Uiso 0.725(13) 1 calc PR B 3 
C1W C 0.2387(8) 0.5146(3) 0.2734(10) 0.111(7) Uani 0.275(13) 1 d PDU B 4 
H1WA H 0.2831 0.5237 0.2792 0.133 Uiso 0.275(13) 1 calc PR B 4 
Cl1C Cl 0.33043(8) 0.72430(4) 0.24423(13) 0.0230(3) Uani 1 1 d U . . 
Cl2C Cl 0.28036(8) 0.80755(4) 0.18070(13) 0.0242(3) Uani 1 1 d U . . 
Cl1T Cl 0.2317(5) 0.52730(17) 0.1404(6) 0.135(4) Uani 0.725(13) 1 d PDU B 3 
Cl2T Cl 0.2181(4) 0.46784(10) 0.2563(4) 0.0621(16) Uani 0.725(13) 1 d PDU B 3 
Cl3T Cl 0.2219(4) 0.53302(18) 0.3457(7) 0.149(4) Uani 0.725(13) 1 d PDU B 3 
Cl1U Cl 0.2577(10) 0.5259(4) 0.5376(8) 0.156(7) Uani 0.380(10) 1 d PDU A 2 
Cl2U Cl 0.2702(6) 0.48654(14) 0.7098(5) 0.058(2) Uani 0.380(10) 1 d PDU A 2 
Cl3U Cl 0.3317(13) 0.5509(4) 0.6955(16) 0.192(10) Uani 0.380(10) 1 d PDU A 2 
Cl1V Cl 0.3722(5) 0.49767(19) 0.5571(5) 0.142(5) Uani 0.620(10) 1 d PDU A 1 
Cl2V Cl 0.2869(9) 0.4863(2) 0.7146(11) 0.224(8) Uani 0.620(10) 1 d PDU A 1 
Cl3V Cl 0.3236(4) 0.55371(14) 0.6648(8) 0.116(4) Uani 0.620(10) 1 d PDU A 1 
Cl1W Cl 0.1988(11) 0.5393(4) 0.1894(14) 0.129(7) Uani 0.275(13) 1 d PDU B 4 
Cl2W Cl 0.2439(9) 0.4729(4) 0.2356(14) 0.073(5) Uani 0.275(13) 1 d PDU B 4 
Cl3W Cl 0.2034(11) 0.5175(5) 0.3862(10) 0.110(6) Uani 0.275(13) 1 d PDU B 4 
F1 F 0.3287(3) 0.83067(13) 0.6422(4) 0.0569(16) Uani 1 1 d DU . . 
F2 F 0.3701(3) 0.78282(15) 0.6792(4) 0.081(2) Uani 1 1 d DU . . 
F3 F 0.4058(2) 0.81084(14) 0.5581(4) 0.0537(15) Uani 1 1 d DU . . 
F4 F 0.0455(3) 0.70650(12) 0.2971(4) 0.067(2) Uani 1 1 d DU . . 
F5 F 0.0146(2) 0.73410(13) 0.1723(3) 0.0470(13) Uani 1 1 d DU . . 
F6 F 0.0057(2) 0.75617(14) 0.3131(4) 0.0595(17) Uani 1 1 d DU . . 
N1 N 0.2197(3) 0.67273(16) 0.2910(5) 0.0243(13) Uani 1 1 d U . . 
H1A H 0.2081 0.6937 0.2680 0.029 Uiso 1 1 calc R . . 
H1B H 0.1963 0.6568 0.2577 0.029 Uiso 1 1 calc R . . 
N2 N 0.3188(3) 0.67023(16) 0.4195(4) 0.0222(12) Uani 1 1 d U . . 
H2A H 0.3535 0.6593 0.4459 0.027 Uiso 1 1 calc R . . 
H2B H 0.3206 0.6928 0.4365 0.027 Uiso 1 1 calc R . . 
N3 N 0.2522(3) 0.86539(16) 0.3257(4) 0.0225(11) Uani 1 1 d U . . 
H3A H 0.2756 0.8477 0.3508 0.027 Uiso 1 1 calc R . . 
H3B H 0.2677 0.8851 0.3524 0.027 Uiso 1 1 calc R . . 
N4 N 0.1627(3) 0.86127(16) 0.1829(5) 0.0248(12) Uani 1 1 d U . . 
H4A H 0.1433 0.8725 0.1325 0.030 Uiso 1 1 calc R . . 
H4B H 0.1518 0.8387 0.1794 0.030 Uiso 1 1 calc R . . 
O1 O 0.2889(2) 0.80582(11) 0.4496(3) 0.0374(14) Uani 1 1 d DU . . 
O2 O 0.24106(18) 0.77624(12) 0.5859(3) 0.0352(13) Uani 1 1 d DU . . 
O3 O 0.3281(3) 0.75016(9) 0.4965(4) 0.0449(16) Uani 1 1 d DU . . 
O4 O 0.1457(2) 0.75740(12) 0.3423(2) 0.0422(15) Uani 1 1 d DU . . 
O5 O 0.1554(2) 0.73189(11) 0.1827(3) 0.0376(13) Uani 1 1 d DU . . 
O6 O 0.1090(2) 0.78811(8) 0.2001(3) 0.0313(12) Uani 1 1 d DU . . 
O7 O 0.2896(3) 0.61538(13) 0.2845(4) 0.0248(10) Uani 1 1 d U . . 
O8 O 0.2509(3) 0.91810(13) 0.2036(4) 0.0303(12) Uani 1 1 d U . . 
P1 P 0.29717(8) 0.65626(4) 0.09951(13) 0.0194(3) Uani 1 1 d U . . 
P2 P 0.43152(8) 0.66576(5) 0.25623(12) 0.0216(3) Uani 1 1 d U . . 
P3 P 0.26288(9) 0.86016(4) 0.00407(12) 0.0210(3) Uani 1 1 d U . . 
P4 P 0.37346(10) 0.88107(5) 0.19670(14) 0.0275(4) Uani 1 1 d U . . 
Ru2 Ru 0.31910(2) 0.664798(14) 0.26112(4) 0.01778(11) Uani 1 1 d U . . 
Ru3 Ru 0.26720(3) 0.867048(14) 0.17345(4) 0.02052(12) Uani 1 1 d U . . 
S1 S 0.29686(8) 0.78116(5) 0.52610(12) 0.0266(4) Uani 1 1 d DU . . 
S2 S 0.12187(7) 0.75558(4) 0.24426(12) 0.0253(4) Uani 1 1 d DU . . 
S1G S 0.00582(19) 0.48729(10) 0.2497(3) 0.0335(8) Uani 0.50 1 d PDU . 9 
O1G O 0.0413(5) 0.5126(3) 0.1965(11) 0.051(4) Uani 0.50 1 d PDU . 9 
O2G O -0.0525(4) 0.4764(3) 0.2033(11) 0.043(3) Uani 0.50 1 d PDU . 9 
O3G O 0.0442(5) 0.4601(2) 0.2887(10) 0.050(4) Uani 0.50 1 d PDU . 9 
C1G C -0.0195(5) 0.51072(19) 0.3571(5) 0.058(4) Uani 0.50 1 d PDU . 9 
F1G F 0.0290(5) 0.5188(3) 0.4139(9) 0.063(4) Uani 0.50 1 d PDU . 9 
F2G F -0.0608(6) 0.4932(3) 0.4091(9) 0.070(4) Uani 0.50 1 d PDU . 9 
F3G F -0.0476(7) 0.5392(3) 0.3295(8) 0.070(4) Uani 0.50 1 d PDU . 9 
C1X C 0.4879(6) 0.5112(3) 0.2698(5) 0.148(7) Uani 0.50 1 d PDU C 7 
H1XA H 0.4726 0.5352 0.2708 0.177 Uiso 0.50 1 calc PR C 7 
Cl1X Cl 0.4294(7) 0.4864(3) 0.3224(7) 0.134(5) Uani 0.50 1 d PDU . 7 
Cl2X Cl 0.5000 0.5000 0.1502(4) 0.132(3) Uani 1 2 d SDU . 7 
Cl3X Cl 0.5581(8) 0.5095(6) 0.3349(7) 0.211(8) Uani 0.50 1 d PDU . 7 
  
loop_ 
 _atom_site_aniso_label 
 _atom_site_aniso_U_11 
 _atom_site_aniso_U_22 
 _atom_site_aniso_U_33 
 _atom_site_aniso_U_23 
 _atom_site_aniso_U_13 
 _atom_site_aniso_U_12 
Ag1 0.0243(3) 0.0339(3) 0.0200(2) 0.0023(2) -0.0001(2) 0.0022(2) 
C7 0.035(4) 0.040(4) 0.025(3) -0.003(3) 0.000(3) -0.004(3) 
C16 0.032(3) 0.025(3) 0.026(3) -0.004(3) 0.002(3) 0.002(3) 
C17 0.021(3) 0.026(3) 0.029(4) -0.002(3) 0.010(3) -0.002(3) 
C18 0.051(4) 0.018(3) 0.022(3) 0.002(3) 0.002(3) 0.002(3) 
C19 0.016(3) 0.043(4) 0.028(4) 0.000(3) -0.001(3) 0.002(3) 
C20 0.030(3) 0.039(4) 0.024(3) -0.001(3) 0.003(3) 0.018(3) 
C21 0.024(3) 0.031(3) 0.023(3) -0.006(3) 0.006(3) 0.004(3) 
C23 0.015(3) 0.052(5) 0.038(4) -0.008(4) 0.001(3) 0.003(3) 
C27 0.014(3) 0.046(4) 0.026(3) 0.000(3) 0.005(2) 0.000(3) 
C28 0.023(3) 0.025(3) 0.017(3) 0.001(2) -0.002(3) 0.006(3) 
C30 0.023(3) 0.031(3) 0.020(3) -0.001(3) 0.000(3) -0.004(3) 
C34 0.018(3) 0.028(3) 0.023(3) 0.005(3) -0.004(3) 0.000(3) 
C35 0.021(3) 0.041(4) 0.020(3) -0.004(3) -0.006(3) -0.004(3) 
C36 0.017(3) 0.049(4) 0.028(4) -0.014(3) -0.007(3) 0.011(3) 
C37 0.022(3) 0.024(3) 0.018(3) -0.003(2) 0.001(2) 0.002(3) 
C38 0.023(3) 0.029(4) 0.029(4) -0.001(3) -0.001(3) 0.001(3) 
C39 0.024(4) 0.043(4) 0.048(5) -0.008(4) 0.006(3) -0.004(3) 
C40 0.019(3) 0.034(3) 0.024(3) 0.003(3) 0.004(3) -0.005(3) 
C42 0.028(4) 0.052(5) 0.036(4) -0.001(4) 0.008(3) 0.006(3) 
C44 0.018(3) 0.033(3) 0.019(3) -0.001(3) -0.003(2) -0.003(3) 
C45 0.022(3) 0.042(4) 0.030(3) -0.005(3) 0.007(3) -0.005(3) 
C46 0.055(5) 0.054(5) 0.043(5) -0.015(4) 0.022(4) -0.023(4) 
C47 0.032(3) 0.025(3) 0.020(3) 0.003(3) 0.005(3) 0.004(3) 
C50 0.030(4) 0.022(3) 0.030(4) -0.001(3) 0.001(3) 0.003(3) 
C51 0.036(4) 0.041(4) 0.012(3) -0.001(3) -0.003(3) 0.001(3) 
C52 0.030(4) 0.034(4) 0.022(3) 0.004(3) 0.001(3) 0.007(3) 
C53 0.018(3) 0.039(4) 0.017(3) 0.001(3) -0.004(3) -0.004(3) 
C54 0.044(4) 0.022(3) 0.031(4) -0.006(3) 0.004(3) 0.007(3) 
C55 0.016(3) 0.041(4) 0.024(3) -0.013(3) 0.005(3) 0.000(3) 
C56 0.021(3) 0.057(5) 0.029(4) -0.006(4) 0.004(3) 0.017(3) 
C57 0.032(4) 0.055(5) 0.016(3) 0.003(3) 0.003(3) -0.010(4) 
C58 0.027(3) 0.032(4) 0.035(4) -0.004(3) 0.001(3) -0.004(3) 
C59 0.047(5) 0.066(6) 0.051(5) -0.024(4) 0.018(4) -0.016(5) 
C60 0.012(3) 0.046(4) 0.019(3) 0.002(3) -0.002(2) -0.006(3) 
C61 0.035(4) 0.064(6) 0.030(4) 0.007(4) -0.003(4) -0.008(4) 
C62 0.026(4) 0.060(5) 0.048(5) -0.007(4) -0.004(4) -0.008(4) 
C63 0.037(4) 0.029(4) 0.019(3) 0.002(3) 0.007(3) 0.004(3) 
C64 0.028(4) 0.046(4) 0.024(3) -0.008(3) 0.005(3) -0.005(3) 
C66 0.042(4) 0.054(5) 0.020(3) -0.009(3) 0.002(3) -0.012(4) 
C67 0.012(3) 0.050(4) 0.032(4) -0.002(3) 0.003(3) 0.002(3) 
C68 0.047(5) 0.062(5) 0.031(4) 0.003(4) -0.006(4) 0.015(4) 
C70 0.021(3) 0.079(6) 0.034(4) -0.015(4) 0.003(3) 0.018(4) 
C71 0.023(3) 0.057(5) 0.033(4) 0.002(4) 0.003(3) -0.015(3) 
C72 0.046(4) 0.023(3) 0.028(4) 0.001(3) 0.001(3) 0.002(3) 
C73 0.021(3) 0.031(3) 0.030(3) 0.003(3) 0.005(3) 0.001(3) 
C74 0.022(3) 0.060(5) 0.030(4) -0.017(4) -0.004(3) 0.004(3) 
C75 0.034(4) 0.052(5) 0.037(4) 0.014(4) -0.012(4) -0.014(4) 
C76 0.023(3) 0.029(3) 0.024(3) -0.007(3) -0.002(3) 0.011(3) 
C78 0.033(4) 0.054(5) 0.040(4) -0.011(4) 0.000(4) 0.017(4) 
C79 0.051(5) 0.061(5) 0.053(5) -0.027(5) 0.000(4) 0.016(5) 
C80 0.056(5) 0.045(5) 0.044(5) -0.016(4) -0.008(4) -0.006(4) 
C81 0.030(4) 0.068(6) 0.070(6) -0.015(5) -0.007(4) -0.016(4) 
C82 0.029(4) 0.076(6) 0.051(5) -0.024(5) -0.001(4) 0.007(4) 
C84 0.036(4) 0.039(4) 0.031(4) 0.006(3) -0.005(3) 0.010(3) 
C85 0.037(4) 0.040(4) 0.062(6) 0.006(4) 0.003(4) -0.010(4) 
C86 0.024(3) 0.050(5) 0.032(4) 0.003(3) 0.003(3) 0.001(3) 
C87 0.085(6) 0.032(4) 0.034(4) -0.008(4) 0.011(4) 0.000(4) 
C88 0.030(4) 0.053(5) 0.043(4) -0.011(4) 0.010(4) -0.013(4) 
C90 0.029(4) 0.057(5) 0.034(4) -0.006(4) 0.001(3) 0.004(4) 
C91 0.031(4) 0.054(5) 0.025(4) 0.005(3) 0.002(3) 0.014(4) 
C92 0.021(3) 0.038(4) 0.019(3) 0.001(3) 0.002(3) -0.004(3) 
C94 0.018(3) 0.046(4) 0.023(3) -0.001(3) 0.005(3) -0.001(3) 
C95 0.024(3) 0.041(4) 0.025(3) -0.003(3) -0.001(3) 0.000(3) 
C96 0.042(4) 0.034(4) 0.030(4) 0.006(3) 0.009(3) 0.012(3) 
C97 0.021(3) 0.056(5) 0.019(3) -0.001(3) 0.001(3) 0.000(3) 
C98 0.031(3) 0.034(3) 0.023(3) 0.005(3) 0.000(3) 0.013(3) 
C99 0.034(4) 0.048(5) 0.037(4) 0.011(4) -0.004(3) 0.003(4) 
C100 0.026(3) 0.025(3) 0.022(3) -0.005(3) 0.002(3) -0.006(3) 
C101 0.037(4) 0.090(6) 0.024(4) -0.016(4) 0.001(3) 0.005(5) 
C102 0.025(4) 0.048(4) 0.032(4) 0.001(3) -0.003(3) -0.010(3) 
C103 0.020(3) 0.079(6) 0.030(4) -0.012(4) 0.001(3) 0.002(4) 
C104 0.024(3) 0.047(5) 0.042(4) -0.017(4) -0.007(3) 0.007(3) 
C105 0.035(4) 0.034(4) 0.038(4) 0.001(3) 0.008(3) -0.004(3) 
C106 0.026(4) 0.071(5) 0.038(4) -0.018(4) 0.006(3) -0.012(4) 
C107 0.066(6) 0.055(5) 0.049(5) -0.029(4) -0.004(5) 0.012(5) 
C110 0.064(6) 0.031(4) 0.041(5) 0.008(4) 0.005(4) -0.018(4) 
C111 0.018(4) 0.088(6) 0.052(5) -0.035(5) -0.003(3) -0.012(4) 
C112 0.025(4) 0.088(6) 0.046(5) -0.018(5) 0.010(4) -0.001(4) 
C113 0.026(4) 0.056(5) 0.061(5) 0.021(4) 0.017(4) -0.001(4) 
C115 0.057(5) 0.025(4) 0.033(4) -0.003(3) -0.002(4) 0.007(4) 
C116 0.042(4) 0.032(4) 0.026(3) -0.003(3) 0.007(3) -0.007(3) 
C117 0.067(6) 0.048(5) 0.049(5) 0.004(4) 0.012(5) -0.026(5) 
C119 0.026(4) 0.071(6) 0.047(5) -0.025(4) -0.003(3) 0.004(4) 
C120 0.018(3) 0.042(4) 0.041(4) 0.002(4) 0.010(3) 0.000(3) 
C121 0.029(4) 0.036(4) 0.059(5) 0.011(4) 0.010(4) -0.007(3) 
C122 0.031(4) 0.084(6) 0.044(5) -0.004(5) -0.004(4) 0.014(4) 
C124 0.026(4) 0.071(6) 0.048(5) -0.022(5) -0.001(3) 0.008(4) 
C128 0.048(5) 0.056(5) 0.030(4) -0.004(4) 0.002(4) 0.000(4) 
C130 0.060(5) 0.078(6) 0.033(4) 0.008(4) 0.001(4) 0.006(5) 
C132 0.049(5) 0.029(4) 0.026(4) -0.004(3) -0.002(3) 0.001(3) 
C133 0.075(6) 0.034(4) 0.048(5) -0.004(4) 0.013(5) 0.019(4) 
C134 0.093(7) 0.034(4) 0.036(4) -0.007(4) 0.006(5) 0.023(5) 
C135 0.048(5) 0.044(4) 0.025(4) 0.002(3) -0.001(3) 0.006(4) 
C136 0.057(5) 0.054(5) 0.039(5) 0.022(4) 0.013(4) 0.016(4) 
C137 0.043(4) 0.044(4) 0.036(4) 0.003(4) 0.015(4) -0.011(4) 
C138 0.078(6) 0.041(5) 0.051(5) 0.011(4) 0.011(5) -0.026(5) 
C139 0.052(5) 0.044(5) 0.042(5) 0.001(4) 0.010(4) -0.017(4) 
C140 0.045(4) 0.034(4) 0.033(4) -0.012(3) 0.010(3) -0.010(3) 
C141 0.057(5) 0.027(4) 0.030(4) -0.004(3) 0.000(4) -0.008(3) 
C142 0.055(5) 0.029(4) 0.036(4) 0.008(3) 0.003(4) 0.017(4) 
C143 0.032(4) 0.080(6) 0.050(5) -0.015(5) -0.002(4) 0.022(4) 
C144 0.050(5) 0.040(4) 0.032(4) -0.011(3) 0.000(4) -0.012(4) 
C145 0.032(4) 0.051(5) 0.075(6) 0.020(5) 0.012(4) -0.007(4) 
C146 0.041(5) 0.056(5) 0.054(5) -0.002(4) 0.005(4) 0.013(4) 
C1U 0.173(15) 0.065(12) 0.129(14) 0.017(13) -0.035(14) -0.046(13) 
C1V 0.166(14) 0.062(10) 0.121(13) 0.009(11) -0.036(13) -0.058(11) 
C1T 0.045(7) 0.034(6) 0.152(12) -0.007(8) -0.031(9) 0.006(6) 
C1W 0.100(13) 0.069(12) 0.163(14) -0.009(13) -0.018(13) 0.004(12) 
Cl1C 0.0210(7) 0.0238(7) 0.0241(8) 0.0007(6) 0.0010(6) -0.0008(6) 
Cl2C 0.0283(8) 0.0242(8) 0.0202(7) 0.0025(6) 0.0018(7) 0.0018(6) 
Cl1T 0.139(7) 0.056(4) 0.211(9) 0.042(5) 0.002(7) -0.035(4) 
Cl2T 0.069(4) 0.0366(19) 0.081(3) -0.003(2) -0.027(3) 0.005(2) 
Cl3T 0.111(6) 0.092(5) 0.245(11) -0.109(7) -0.032(7) 0.014(4) 
Cl1U 0.195(16) 0.152(13) 0.122(11) 0.035(10) 0.024(12) -0.002(12) 
Cl2U 0.115(7) 0.019(3) 0.041(3) 0.008(2) -0.009(4) -0.021(3) 
Cl3U 0.223(19) 0.144(16) 0.210(18) -0.031(14) -0.071(16) -0.039(14) 
Cl1V 0.242(12) 0.114(6) 0.068(4) 0.002(4) 0.009(6) -0.101(7) 
Cl2V 0.271(18) 0.210(14) 0.190(14) 0.019(12) -0.019(13) -0.051(13) 
Cl3V 0.090(4) 0.048(3) 0.208(10) 0.038(5) -0.056(6) -0.020(3) 
Cl1W 0.135(14) 0.055(8) 0.197(16) 0.034(10) 0.034(13) -0.013(8) 
Cl2W 0.062(9) 0.054(7) 0.103(11) -0.025(7) -0.041(8) 0.020(6) 
Cl3W 0.106(12) 0.073(10) 0.151(14) -0.026(10) 0.004(11) -0.009(9) 
F1 0.060(4) 0.071(4) 0.040(3) -0.023(3) 0.008(3) -0.017(3) 
F2 0.075(5) 0.109(6) 0.057(4) 0.039(4) -0.040(4) -0.030(4) 
F3 0.029(3) 0.072(4) 0.060(4) 0.009(3) 0.002(3) -0.009(3) 
F4 0.054(4) 0.068(4) 0.078(5) 0.044(4) -0.020(3) -0.020(3) 
F5 0.037(3) 0.062(3) 0.042(3) 0.000(3) -0.013(2) -0.014(2) 
F6 0.029(3) 0.096(5) 0.054(4) -0.010(3) 0.012(3) -0.012(3) 
N1 0.016(3) 0.029(3) 0.029(3) 0.000(2) 0.010(2) 0.002(2) 
N2 0.017(2) 0.031(3) 0.018(3) -0.003(2) 0.005(2) -0.003(2) 
N3 0.019(3) 0.033(3) 0.016(2) 0.002(2) -0.006(2) 0.001(2) 
N4 0.022(3) 0.025(3) 0.027(3) 0.001(3) 0.000(2) 0.007(2) 
O1 0.045(3) 0.049(3) 0.018(3) 0.006(2) -0.006(2) 0.006(3) 
O2 0.026(3) 0.054(4) 0.026(3) -0.008(2) 0.005(2) 0.002(3) 
O3 0.055(4) 0.037(3) 0.042(4) 0.006(3) 0.021(3) 0.009(3) 
O4 0.026(3) 0.077(4) 0.024(3) 0.007(3) -0.002(2) -0.004(3) 
O5 0.036(3) 0.034(3) 0.043(3) -0.004(3) -0.001(3) 0.008(2) 
O6 0.025(3) 0.031(3) 0.037(3) 0.003(2) 0.002(2) 0.003(2) 
O7 0.026(2) 0.022(2) 0.026(3) 0.0004(19) 0.004(2) -0.004(2) 
O8 0.046(3) 0.023(2) 0.023(2) -0.0055(19) -0.003(2) 0.001(2) 
P1 0.0156(7) 0.0231(9) 0.0196(8) -0.0007(6) -0.0003(6) 0.0007(6) 
P2 0.0156(7) 0.0330(9) 0.0160(8) -0.0005(8) 0.0000(6) 0.0047(7) 
P3 0.0258(9) 0.0205(8) 0.0167(8) -0.0005(6) 0.0032(7) 0.0019(7) 
P4 0.0272(9) 0.0314(10) 0.0239(9) -0.0008(7) 0.0041(7) -0.0049(8) 
Ru2 0.0134(2) 0.0223(2) 0.0176(2) 0.0002(2) 0.00196(19) 0.00098(19) 
Ru3 0.0236(3) 0.0218(3) 0.0161(2) -0.0007(2) 0.0017(2) 0.0012(2) 
S1 0.0259(8) 0.0379(10) 0.0159(8) 0.0003(7) 0.0027(7) 0.0047(7) 
S2 0.0177(7) 0.0386(9) 0.0196(8) 0.0030(7) -0.0020(7) -0.0010(7) 
S1G 0.038(2) 0.0301(16) 0.033(2) -0.0037(16) 0.0055(17) 0.0097(15) 
O1G 0.060(8) 0.055(8) 0.039(7) -0.003(7) 0.017(7) 0.005(7) 
O2G 0.044(7) 0.047(7) 0.038(6) 0.008(6) 0.004(6) 0.006(6) 
O3G 0.064(8) 0.045(7) 0.040(7) -0.015(6) -0.008(6) 0.021(6) 
C1G 0.085(10) 0.036(7) 0.055(8) -0.010(7) 0.034(8) 0.001(7) 
F1G 0.100(10) 0.033(6) 0.057(7) -0.020(5) 0.024(7) -0.021(6) 
F2G 0.100(10) 0.053(8) 0.058(7) 0.002(6) 0.048(7) -0.002(7) 
F3G 0.113(10) 0.036(6) 0.061(8) -0.002(6) 0.034(8) 0.018(6) 
C1X 0.165(13) 0.154(13) 0.124(12) -0.024(12) 0.052(12) -0.044(12) 
Cl1X 0.227(12) 0.072(5) 0.102(6) -0.022(5) 0.094(8) -0.085(7) 
Cl2X 0.066(4) 0.228(9) 0.102(5) 0.000 0.000 -0.007(5) 
Cl3X 0.261(18) 0.175(16) 0.197(16) -0.035(14) 0.057(15) -0.025(15) 
  
_geom_special_details 
; 
 All esds (except the esd in the dihedral angle between two l.s. planes) 
 are estimated using the full covariance matrix.  The cell esds are taken 
 into account individually in the estimation of esds in distances, angles 
 and torsion angles; correlations between esds in cell parameters are only 
 used when they are defined by crystal symmetry.  An approximate (isotropic) 
 treatment of cell esds is used for estimating esds involving l.s. planes. 
; 
  
loop_ 
 _geom_bond_atom_site_label_1 
 _geom_bond_atom_site_label_2 
 _geom_bond_distance 
 _geom_bond_site_symmetry_2 
 _geom_bond_publ_flag 
Ag1 O4 2.389(5) . ? 
Ag1 O1 2.445(6) . ? 
Ag1 Cl1C 2.5060(17) . ? 
Ag1 Cl2C 2.5578(18) . ? 
C7 C23 1.387(13) . ? 
C7 C80 1.383(13) . ? 
C7 P4 1.831(8) . ? 
C16 O7 1.301(9) . ? 
C16 C98 1.493(11) . ? 
C16 C54 1.519(11) . ? 
C16 Ru2 2.182(7) . ? 
C17 C73 1.525(10) . ? 
C17 N1 1.531(10) . ? 
C17 C40 1.540(11) . ? 
C17 H17A 1.0000 . ? 
C18 O8 1.332(9) . ? 
C18 C141 1.485(13) . ? 
C18 C72 1.493(12) . ? 
C18 Ru3 2.196(7) . ? 
C19 C34 1.397(11) . ? 
C19 C86 1.412(12) . ? 
C19 H19A 0.9500 . ? 
C20 C91 1.382(12) . ? 
C20 C98 1.400(12) . ? 
C20 P2 1.823(8) . ? 
C21 C37 1.369(10) . ? 
C21 C38 1.408(11) . ? 
C21 H21A 0.9500 . ? 
C23 C90 1.392(12) . ? 
C23 H23A 0.9500 . ? 
C27 C60 1.394(12) . ? 
C27 C56 1.404(12) . ? 
C27 P2 1.808(7) . ? 
C28 C44 1.507(9) . ? 
C28 N3 1.511(9) . ? 
C28 C76 1.515(10) . ? 
C28 H28A 1.0000 . ? 
C30 C37 1.389(10) . ? 
C30 C51 1.393(11) . ? 
C30 H30A 0.9500 . ? 
C34 C52 1.426(11) . ? 
C34 P1 1.815(7) . ? 
C35 C38 1.336(11) . ? 
C35 C51 1.401(11) . ? 
C35 H35A 0.9500 . ? 
C36 C78 1.368(12) . ? 
C36 C104 1.368(14) . ? 
C36 C76 1.525(11) . ? 
C37 P3 1.839(7) . ? 
C38 H38A 0.9500 . ? 
C39 C88 1.377(14) . ? 
C39 C58 1.394(11) . ? 
C39 H39A 0.9500 . ? 
C40 C45 1.511(11) . ? 
C40 N2 1.516(9) . ? 
C40 H40A 1.0000 . ? 
C42 C64 1.375(13) . ? 
C42 C146 1.400(13) . ? 
C42 H42A 0.9500 . ? 
C44 C92 1.353(10) . ? 
C44 C116 1.396(11) . ? 
C45 C128 1.376(13) . ? 
C45 C46 1.388(13) . ? 
C46 C59 1.374(15) . ? 
C46 H46A 0.9500 . ? 
C47 C72 1.377(11) . ? 
C47 C63 1.403(11) . ? 
C47 P3 1.832(8) . ? 
C50 C132 1.398(11) . ? 
C50 C54 1.416(11) . ? 
C50 P1 1.812(8) . ? 
C51 H51A 0.9500 . ? 
C52 C84 1.379(12) . ? 
C52 H52A 0.9500 . ? 
C53 C67 1.395(10) . ? 
C53 C94 1.407(11) . ? 
C53 P2 1.829(7) . ? 
C54 C133 1.381(12) . ? 
C55 C62 1.375(13) . ? 
C55 C74 1.395(13) . ? 
C55 P1 1.846(7) . ? 
C56 C70 1.384(12) . ? 
C56 H56A 0.9500 . ? 
C57 C66 1.362(13) . ? 
C57 C92 1.408(11) . ? 
C57 H57A 0.9500 . ? 
C58 C100 1.370(11) . ? 
C58 H58A 0.9500 . ? 
C59 C101 1.361(17) . ? 
C59 H59A 0.9500 . ? 
C60 C71 1.409(11) . ? 
C60 H60A 0.9500 . ? 
C61 F1 1.323(3) . ? 
C61 F2 1.323(3) . ? 
C61 F3 1.323(3) . ? 
C61 S1 1.827(6) . ? 
C62 C81 1.376(13) . ? 
C62 H62A 0.9500 . ? 
C63 C96 1.388(11) . ? 
C63 H63A 0.9500 . ? 
C64 C106 1.419(12) . ? 
C64 P4 1.838(9) . ? 
C66 C144 1.389(13) . ? 
C66 H66A 0.9500 . ? 
C67 C97 1.364(12) . ? 
C67 H67A 0.9500 . ? 
C68 C136 1.398(16) . ? 
C68 C91 1.409(14) . ? 
C68 H68A 0.9500 . ? 
C70 C103 1.375(16) . ? 
C70 H70A 0.9500 . ? 
C71 C103 1.383(15) . ? 
C71 H71A 0.9500 . ? 
C72 C115 1.390(12) . ? 
C73 C121 1.387(13) . ? 
C73 C120 1.397(11) . ? 
C74 C124 1.382(12) . ? 
C74 H74A 0.9500 . ? 
C75 F4 1.323(3) . ? 
C75 F6 1.323(3) . ? 
C75 F5 1.323(3) . ? 
C75 S2 1.827(6) . ? 
C76 N4 1.514(9) . ? 
C76 H76A 1.0000 . ? 
C78 C143 1.405(14) . ? 
C78 H78A 0.9500 . ? 
C79 C107 1.386(18) . ? 
C79 C90 1.392(15) . ? 
C79 H79A 0.9500 . ? 
C80 C107 1.416(14) . ? 
C80 H80A 0.9500 . ? 
C81 C111 1.388(18) . ? 
C81 H81A 0.9500 . ? 
C82 C119 1.315(16) . ? 
C82 C143 1.400(17) . ? 
C82 H82A 0.9500 . ? 
C84 C99 1.402(13) . ? 
C84 H84A 0.9500 . ? 
C85 C145 1.371(15) . ? 
C85 C121 1.416(12) . ? 
C85 H85A 0.9500 . ? 
C86 C99 1.363(13) . ? 
C86 H86A 0.9500 . ? 
C87 C132 1.375(13) . ? 
C87 C134 1.400(15) . ? 
C87 H87A 0.9500 . ? 
C88 C137 1.397(14) . ? 
C88 H88A 0.9500 . ? 
C90 H90A 0.9500 . ? 
C91 H91A 0.9500 . ? 
C92 H92A 0.9500 . ? 
C94 C95 1.363(11) . ? 
C94 H94A 0.9500 . ? 
C95 C102 1.374(11) . ? 
C95 H95A 0.9500 . ? 
C96 C142 1.381(13) . ? 
C96 H96A 0.9500 . ? 
C97 C102 1.403(12) . ? 
C97 H97A 0.9500 . ? 
C98 C135 1.400(12) . ? 
C99 H99A 0.9500 . ? 
C100 C105 1.368(12) . ? 
C100 P3 1.840(8) . ? 
C101 C130 1.425(16) . ? 
C101 H10A 0.9500 . ? 
C102 H10B 0.9500 . ? 
C103 H10C 0.9500 . ? 
C104 C119 1.392(12) . ? 
C104 H10D 0.9500 . ? 
C105 C137 1.396(12) . ? 
C105 H10E 0.9500 . ? 
C106 C112 1.405(15) . ? 
C106 H10F 0.9500 . ? 
C107 H10G 0.9500 . ? 
C110 C138 1.406(15) . ? 
C110 C141 1.434(12) . ? 
C110 H11A 0.9500 . ? 
C111 C124 1.379(17) . ? 
C111 H11B 0.9500 . ? 
C112 C122 1.348(16) . ? 
C112 H11C 0.9500 . ? 
C113 C145 1.360(17) . ? 
C113 C120 1.405(12) . ? 
C113 H11D 0.9500 . ? 
C115 C142 1.371(14) . ? 
C115 H11E 0.9500 . ? 
C116 C144 1.388(12) . ? 
C116 H11F 0.9500 . ? 
C117 C138 1.372(18) . ? 
C117 C139 1.409(15) . ? 
C117 H11G 0.9500 . ? 
C119 H11H 0.9500 . ? 
C120 H12A 0.9500 . ? 
C121 H12B 0.9500 . ? 
C122 C146 1.380(16) . ? 
C122 H12C 0.9500 . ? 
C124 H12D 0.9500 . ? 
C128 C130 1.405(13) . ? 
C128 H12E 0.9500 . ? 
C130 H13A 0.9500 . ? 
C132 H13B 0.9500 . ? 
C133 C134 1.349(14) . ? 
C133 H13C 0.9500 . ? 
C134 H13D 0.9500 . ? 
C135 C136 1.358(15) . ? 
C135 H13E 0.9500 . ? 
C136 H13F 0.9500 . ? 
C137 H13G 0.9500 . ? 
C138 H13H 0.9500 . ? 
C139 C140 1.396(13) . ? 
C139 H13I 0.9500 . ? 
C140 C141 1.414(14) . ? 
C140 P4 1.821(10) . ? 
C142 H14A 0.9500 . ? 
C143 H14B 0.9500 . ? 
C144 H14C 0.9500 . ? 
C145 H14D 0.9500 . ? 
C146 H14E 0.9500 . ? 
C1U Cl3U 1.729(4) . ? 
C1U Cl1U 1.729(4) . ? 
C1U Cl2U 1.729(4) . ? 
C1U H1UA 1.0000 . ? 
C1V Cl3V 1.729(4) . ? 
C1V Cl2V 1.729(4) . ? 
C1V Cl1V 1.729(4) . ? 
C1V H1VA 1.0000 . ? 
C1T Cl2T 1.729(4) . ? 
C1T Cl1T 1.729(4) . ? 
C1T Cl3T 1.729(4) . ? 
C1T H1TA 1.0000 . ? 
C1W Cl1W 1.729(4) . ? 
C1W Cl3W 1.729(4) . ? 
C1W Cl2W 1.729(4) . ? 
C1W H1WA 1.0000 . ? 
Cl1C Ru2 2.3702(17) . ? 
Cl2C Ru3 2.3646(17) . ? 
N1 Ru2 2.149(6) . ? 
N1 H1A 0.9200 . ? 
N1 H1B 0.9200 . ? 
N2 Ru2 2.199(6) . ? 
N2 H2A 0.9200 . ? 
N2 H2B 0.9200 . ? 
N3 Ru3 2.128(6) . ? 
N3 H3A 0.9200 . ? 
N3 H3B 0.9200 . ? 
N4 Ru3 2.207(6) . ? 
N4 H4A 0.9200 . ? 
N4 H4B 0.9200 . ? 
O1 S1 1.447(2) . ? 
O2 S1 1.446(2) . ? 
O3 S1 1.446(2) . ? 
O4 S2 1.446(2) . ? 
O5 S2 1.446(2) . ? 
O6 S2 1.446(2) . ? 
O7 Ru2 2.070(5) . ? 
O8 Ru3 2.084(5) . ? 
P1 Ru2 2.3047(19) . ? 
P2 Ru2 2.3590(17) . ? 
P3 Ru3 2.3579(18) . ? 
P4 Ru3 2.318(2) . ? 
S1G S1G 1.032(7) 2_565 ? 
S1G O1G 1.231(11) 2_565 ? 
S1G O1G 1.446(2) . ? 
S1G O2G 1.446(2) . ? 
S1G O3G 1.446(2) . ? 
S1G C1G 1.514(7) 2_565 ? 
S1G F3G 1.753(13) 2_565 ? 
S1G C1G 1.827(6) . ? 
S1G O2G 1.850(10) 2_565 ? 
O1G O2G 0.50(2) 2_565 ? 
O1G S1G 1.231(11) 2_565 ? 
O2G O1G 0.50(2) 2_565 ? 
O2G S1G 1.850(10) 2_565 ? 
O3G F3G 0.569(15) 2_565 ? 
O3G C1G 1.577(16) 2_565 ? 
C1G C1G 1.175(16) 2_565 ? 
C1G F2G 1.323(3) . ? 
C1G F3G 1.323(3) . ? 
C1G F1G 1.323(3) . ? 
C1G F1G 1.419(15) 2_565 ? 
C1G S1G 1.514(7) 2_565 ? 
C1G O3G 1.577(16) 2_565 ? 
C1G F2G 1.837(18) 2_565 ? 
F1G F2G 0.821(16) 2_565 ? 
F1G C1G 1.419(15) 2_565 ? 
F2G F1G 0.821(16) 2_565 ? 
F2G C1G 1.837(18) 2_565 ? 
F3G O3G 0.569(15) 2_565 ? 
F3G S1G 1.753(13) 2_565 ? 
C1X Cl3X 1.729(4) . ? 
C1X Cl2X 1.729(4) . ? 
C1X Cl1X 1.729(4) . ? 
C1X H1XA 1.0000 . ? 
Cl1X Cl3X 0.35(3) 2_665 ? 
Cl1X C1X 1.88(2) 2_665 ? 
Cl2X Cl2X 0.000(12) 2_665 ? 
Cl2X C1X 1.729(4) 2_665 ? 
Cl3X Cl1X 0.35(3) 2_665 ? 
Cl3X C1X 1.552(15) 2_665 ? 
  
loop_ 
 _geom_angle_atom_site_label_1 
 _geom_angle_atom_site_label_2 
 _geom_angle_atom_site_label_3 
 _geom_angle 
 _geom_angle_site_symmetry_1 
 _geom_angle_site_symmetry_3 
 _geom_angle_publ_flag 
O4 Ag1 O1 105.75(14) . . ? 
O4 Ag1 Cl1C 123.23(11) . . ? 
O1 Ag1 Cl1C 124.18(11) . . ? 
O4 Ag1 Cl2C 112.24(10) . . ? 
O1 Ag1 Cl2C 96.05(9) . . ? 
Cl1C Ag1 Cl2C 89.24(6) . . ? 
C23 C7 C80 119.0(8) . . ? 
C23 C7 P4 118.8(7) . . ? 
C80 C7 P4 122.0(7) . . ? 
O7 C16 C98 119.9(7) . . ? 
O7 C16 C54 115.9(7) . . ? 
C98 C16 C54 117.7(7) . . ? 
O7 C16 Ru2 67.6(4) . . ? 
C98 C16 Ru2 110.1(5) . . ? 
C54 C16 Ru2 115.0(5) . . ? 
C73 C17 N1 110.4(6) . . ? 
C73 C17 C40 108.4(6) . . ? 
N1 C17 C40 110.0(6) . . ? 
C73 C17 H17A 109.4 . . ? 
N1 C17 H17A 109.4 . . ? 
C40 C17 H17A 109.4 . . ? 
O8 C18 C141 119.3(8) . . ? 
O8 C18 C72 117.8(8) . . ? 
C141 C18 C72 117.2(7) . . ? 
O8 C18 Ru3 67.3(4) . . ? 
C141 C18 Ru3 114.1(6) . . ? 
C72 C18 Ru3 109.8(5) . . ? 
C34 C19 C86 118.2(8) . . ? 
C34 C19 H19A 120.9 . . ? 
C86 C19 H19A 120.9 . . ? 
C91 C20 C98 120.6(8) . . ? 
C91 C20 P2 127.8(7) . . ? 
C98 C20 P2 110.5(6) . . ? 
C37 C21 C38 120.3(7) . . ? 
C37 C21 H21A 119.9 . . ? 
C38 C21 H21A 119.9 . . ? 
C7 C23 C90 121.0(9) . . ? 
C7 C23 H23A 119.5 . . ? 
C90 C23 H23A 119.5 . . ? 
C60 C27 C56 118.9(7) . . ? 
C60 C27 P2 117.8(6) . . ? 
C56 C27 P2 123.0(7) . . ? 
C44 C28 N3 108.3(6) . . ? 
C44 C28 C76 116.1(6) . . ? 
N3 C28 C76 108.4(6) . . ? 
C44 C28 H28A 107.9 . . ? 
N3 C28 H28A 107.9 . . ? 
C76 C28 H28A 107.9 . . ? 
C37 C30 C51 120.2(7) . . ? 
C37 C30 H30A 119.9 . . ? 
C51 C30 H30A 119.9 . . ? 
C19 C34 C52 119.6(7) . . ? 
C19 C34 P1 123.8(6) . . ? 
C52 C34 P1 116.6(6) . . ? 
C38 C35 C51 121.8(8) . . ? 
C38 C35 H35A 119.1 . . ? 
C51 C35 H35A 119.1 . . ? 
C78 C36 C104 118.3(8) . . ? 
C78 C36 C76 118.4(8) . . ? 
C104 C36 C76 123.2(7) . . ? 
C21 C37 C30 119.7(7) . . ? 
C21 C37 P3 121.5(5) . . ? 
C30 C37 P3 118.7(6) . . ? 
C35 C38 C21 119.6(8) . . ? 
C35 C38 H38A 120.2 . . ? 
C21 C38 H38A 120.2 . . ? 
C88 C39 C58 119.5(9) . . ? 
C88 C39 H39A 120.3 . . ? 
C58 C39 H39A 120.3 . . ? 
C45 C40 N2 112.4(6) . . ? 
C45 C40 C17 112.9(6) . . ? 
N2 C40 C17 107.3(6) . . ? 
C45 C40 H40A 108.0 . . ? 
N2 C40 H40A 108.0 . . ? 
C17 C40 H40A 108.0 . . ? 
C64 C42 C146 118.8(9) . . ? 
C64 C42 H42A 120.6 . . ? 
C146 C42 H42A 120.6 . . ? 
C92 C44 C116 120.1(7) . . ? 
C92 C44 C28 121.3(7) . . ? 
C116 C44 C28 118.3(7) . . ? 
C128 C45 C46 118.8(8) . . ? 
C128 C45 C40 118.6(8) . . ? 
C46 C45 C40 122.6(8) . . ? 
C59 C46 C45 121.1(11) . . ? 
C59 C46 H46A 119.5 . . ? 
C45 C46 H46A 119.5 . . ? 
C72 C47 C63 121.2(7) . . ? 
C72 C47 P3 110.5(6) . . ? 
C63 C47 P3 127.5(6) . . ? 
C132 C50 C54 120.0(7) . . ? 
C132 C50 P1 126.3(6) . . ? 
C54 C50 P1 113.6(6) . . ? 
C30 C51 C35 118.3(7) . . ? 
C30 C51 H51A 120.8 . . ? 
C35 C51 H51A 120.8 . . ? 
C84 C52 C34 120.0(7) . . ? 
C84 C52 H52A 120.0 . . ? 
C34 C52 H52A 120.0 . . ? 
C67 C53 C94 117.6(7) . . ? 
C67 C53 P2 119.7(6) . . ? 
C94 C53 P2 122.2(5) . . ? 
C133 C54 C50 117.4(8) . . ? 
C133 C54 C16 121.2(8) . . ? 
C50 C54 C16 121.3(7) . . ? 
C62 C55 C74 119.0(8) . . ? 
C62 C55 P1 118.0(7) . . ? 
C74 C55 P1 122.9(7) . . ? 
C70 C56 C27 120.4(10) . . ? 
C70 C56 H56A 119.8 . . ? 
C27 C56 H56A 119.8 . . ? 
C66 C57 C92 120.7(8) . . ? 
C66 C57 H57A 119.6 . . ? 
C92 C57 H57A 119.6 . . ? 
C100 C58 C39 119.5(8) . . ? 
C100 C58 H58A 120.3 . . ? 
C39 C58 H58A 120.3 . . ? 
C101 C59 C46 120.6(10) . . ? 
C101 C59 H59A 119.7 . . ? 
C46 C59 H59A 119.7 . . ? 
C27 C60 C71 120.1(8) . . ? 
C27 C60 H60A 119.9 . . ? 
C71 C60 H60A 119.9 . . ? 
F1 C61 F2 107.9(3) . . ? 
F1 C61 F3 107.9(3) . . ? 
F2 C61 F3 107.9(3) . . ? 
F1 C61 S1 111.1(4) . . ? 
F2 C61 S1 111.2(4) . . ? 
F3 C61 S1 110.5(4) . . ? 
C55 C62 C81 121.2(11) . . ? 
C55 C62 H62A 119.4 . . ? 
C81 C62 H62A 119.4 . . ? 
C96 C63 C47 117.8(8) . . ? 
C96 C63 H63A 121.1 . . ? 
C47 C63 H63A 121.1 . . ? 
C42 C64 C106 120.9(9) . . ? 
C42 C64 P4 122.4(7) . . ? 
C106 C64 P4 116.5(7) . . ? 
C57 C66 C144 118.7(8) . . ? 
C57 C66 H66A 120.7 . . ? 
C144 C66 H66A 120.7 . . ? 
C97 C67 C53 121.2(8) . . ? 
C97 C67 H67A 119.4 . . ? 
C53 C67 H67A 119.4 . . ? 
C136 C68 C91 120.8(9) . . ? 
C136 C68 H68A 119.6 . . ? 
C91 C68 H68A 119.6 . . ? 
C103 C70 C56 120.3(10) . . ? 
C103 C70 H70A 119.9 . . ? 
C56 C70 H70A 119.9 . . ? 
C103 C71 C60 119.4(9) . . ? 
C103 C71 H71A 120.3 . . ? 
C60 C71 H71A 120.3 . . ? 
C47 C72 C115 119.8(8) . . ? 
C47 C72 C18 116.1(7) . . ? 
C115 C72 C18 124.0(7) . . ? 
C121 C73 C120 120.5(8) . . ? 
C121 C73 C17 119.9(7) . . ? 
C120 C73 C17 119.6(7) . . ? 
C124 C74 C55 120.5(10) . . ? 
C124 C74 H74A 119.8 . . ? 
C55 C74 H74A 119.8 . . ? 
F4 C75 F6 108.0(3) . . ? 
F4 C75 F5 107.9(3) . . ? 
F6 C75 F5 107.9(3) . . ? 
F4 C75 S2 111.4(4) . . ? 
F6 C75 S2 111.2(4) . . ? 
F5 C75 S2 110.3(4) . . ? 
N4 C76 C28 107.2(5) . . ? 
N4 C76 C36 112.4(6) . . ? 
C28 C76 C36 114.7(7) . . ? 
N4 C76 H76A 107.4 . . ? 
C28 C76 H76A 107.4 . . ? 
C36 C76 H76A 107.4 . . ? 
C36 C78 C143 121.9(11) . . ? 
C36 C78 H78A 119.1 . . ? 
C143 C78 H78A 119.1 . . ? 
C107 C79 C90 119.3(9) . . ? 
C107 C79 H79A 120.3 . . ? 
C90 C79 H79A 120.3 . . ? 
C7 C80 C107 120.3(11) . . ? 
C7 C80 H80A 119.9 . . ? 
C107 C80 H80A 119.9 . . ? 
C62 C81 C111 119.1(11) . . ? 
C62 C81 H81A 120.4 . . ? 
C111 C81 H81A 120.4 . . ? 
C119 C82 C143 119.4(10) . . ? 
C119 C82 H82A 120.3 . . ? 
C143 C82 H82A 120.3 . . ? 
C52 C84 C99 120.5(8) . . ? 
C52 C84 H84A 119.8 . . ? 
C99 C84 H84A 119.8 . . ? 
C145 C85 C121 118.5(10) . . ? 
C145 C85 H85A 120.8 . . ? 
C121 C85 H85A 120.8 . . ? 
C99 C86 C19 122.3(8) . . ? 
C99 C86 H86A 118.8 . . ? 
C19 C86 H86A 118.8 . . ? 
C132 C87 C134 120.7(9) . . ? 
C132 C87 H87A 119.7 . . ? 
C134 C87 H87A 119.7 . . ? 
C39 C88 C137 121.4(8) . . ? 
C39 C88 H88A 119.3 . . ? 
C137 C88 H88A 119.3 . . ? 
C79 C90 C23 120.2(10) . . ? 
C79 C90 H90A 119.9 . . ? 
C23 C90 H90A 119.9 . . ? 
C20 C91 C68 118.0(9) . . ? 
C20 C91 H91A 121.0 . . ? 
C68 C91 H91A 121.0 . . ? 
C44 C92 C57 120.3(8) . . ? 
C44 C92 H92A 119.9 . . ? 
C57 C92 H92A 119.9 . . ? 
C95 C94 C53 120.3(7) . . ? 
C95 C94 H94A 119.9 . . ? 
C53 C94 H94A 119.9 . . ? 
C94 C95 C102 122.2(8) . . ? 
C94 C95 H95A 118.9 . . ? 
C102 C95 H95A 118.9 . . ? 
C142 C96 C63 120.5(9) . . ? 
C142 C96 H96A 119.7 . . ? 
C63 C96 H96A 119.7 . . ? 
C67 C97 C102 120.8(7) . . ? 
C67 C97 H97A 119.6 . . ? 
C102 C97 H97A 119.6 . . ? 
C135 C98 C20 120.4(8) . . ? 
C135 C98 C16 122.2(8) . . ? 
C20 C98 C16 117.4(7) . . ? 
C86 C99 C84 119.4(8) . . ? 
C86 C99 H99A 120.3 . . ? 
C84 C99 H99A 120.3 . . ? 
C105 C100 C58 121.1(7) . . ? 
C105 C100 P3 122.3(6) . . ? 
C58 C100 P3 116.5(6) . . ? 
C59 C101 C130 120.5(9) . . ? 
C59 C101 H10A 119.7 . . ? 
C130 C101 H10A 119.7 . . ? 
C95 C102 C97 117.8(8) . . ? 
C95 C102 H10B 121.1 . . ? 
C97 C102 H10B 121.1 . . ? 
C70 C103 C71 120.8(8) . . ? 
C70 C103 H10C 119.6 . . ? 
C71 C103 H10C 119.6 . . ? 
C36 C104 C119 119.5(9) . . ? 
C36 C104 H10D 120.2 . . ? 
C119 C104 H10D 120.2 . . ? 
C100 C105 C137 120.8(9) . . ? 
C100 C105 H10E 119.6 . . ? 
C137 C105 H10E 119.6 . . ? 
C112 C106 C64 116.9(10) . . ? 
C112 C106 H10F 121.6 . . ? 
C64 C106 H10F 121.6 . . ? 
C79 C107 C80 120.0(10) . . ? 
C79 C107 H10G 120.0 . . ? 
C80 C107 H10G 120.0 . . ? 
C138 C110 C141 119.2(11) . . ? 
C138 C110 H11A 120.4 . . ? 
C141 C110 H11A 120.4 . . ? 
C124 C111 C81 120.7(8) . . ? 
C124 C111 H11B 119.6 . . ? 
C81 C111 H11B 119.6 . . ? 
C122 C112 C106 123.0(10) . . ? 
C122 C112 H11C 118.5 . . ? 
C106 C112 H11C 118.5 . . ? 
C145 C113 C120 120.7(9) . . ? 
C145 C113 H11D 119.7 . . ? 
C120 C113 H11D 119.7 . . ? 
C142 C115 C72 119.3(8) . . ? 
C142 C115 H11E 120.3 . . ? 
C72 C115 H11E 120.3 . . ? 
C144 C116 C44 119.0(8) . . ? 
C144 C116 H11F 120.5 . . ? 
C44 C116 H11F 120.5 . . ? 
C138 C117 C139 122.5(10) . . ? 
C138 C117 H11G 118.8 . . ? 
C139 C117 H11G 118.8 . . ? 
C82 C119 C104 122.9(12) . . ? 
C82 C119 H11H 118.5 . . ? 
C104 C119 H11H 118.5 . . ? 
C73 C120 C113 118.4(9) . . ? 
C73 C120 H12A 120.8 . . ? 
C113 C120 H12A 120.8 . . ? 
C73 C121 C85 120.0(9) . . ? 
C73 C121 H12B 120.0 . . ? 
C85 C121 H12B 120.0 . . ? 
C112 C122 C146 118.8(10) . . ? 
C112 C122 H12C 120.6 . . ? 
C146 C122 H12C 120.6 . . ? 
C111 C124 C74 119.3(10) . . ? 
C111 C124 H12D 120.3 . . ? 
C74 C124 H12D 120.3 . . ? 
C45 C128 C130 121.8(10) . . ? 
C45 C128 H12E 119.1 . . ? 
C130 C128 H12E 119.1 . . ? 
C128 C130 C101 117.2(11) . . ? 
C128 C130 H13A 121.4 . . ? 
C101 C130 H13A 121.4 . . ? 
C87 C132 C50 119.3(8) . . ? 
C87 C132 H13B 120.4 . . ? 
C50 C132 H13B 120.4 . . ? 
C134 C133 C54 123.3(10) . . ? 
C134 C133 H13C 118.4 . . ? 
C54 C133 H13C 118.4 . . ? 
C133 C134 C87 118.9(9) . . ? 
C133 C134 H13D 120.5 . . ? 
C87 C134 H13D 120.5 . . ? 
C136 C135 C98 119.5(10) . . ? 
C136 C135 H13E 120.3 . . ? 
C98 C135 H13E 120.3 . . ? 
C135 C136 C68 120.6(9) . . ? 
C135 C136 H13F 119.7 . . ? 
C68 C136 H13F 119.7 . . ? 
C88 C137 C105 117.7(8) . . ? 
C88 C137 H13G 121.1 . . ? 
C105 C137 H13G 121.1 . . ? 
C117 C138 C110 120.3(10) . . ? 
C117 C138 H13H 119.8 . . ? 
C110 C138 H13H 119.8 . . ? 
C140 C139 C117 117.5(11) . . ? 
C140 C139 H13I 121.2 . . ? 
C117 C139 H13I 121.2 . . ? 
C139 C140 C141 122.1(9) . . ? 
C139 C140 P4 126.1(8) . . ? 
C141 C140 P4 111.8(7) . . ? 
C140 C141 C110 118.3(9) . . ? 
C140 C141 C18 122.9(8) . . ? 
C110 C141 C18 118.6(9) . . ? 
C115 C142 C96 121.1(8) . . ? 
C115 C142 H14A 119.5 . . ? 
C96 C142 H14A 119.5 . . ? 
C78 C143 C82 117.9(10) . . ? 
C78 C143 H14B 121.0 . . ? 
C82 C143 H14B 121.0 . . ? 
C66 C144 C116 121.2(8) . . ? 
C66 C144 H14C 119.4 . . ? 
C116 C144 H14C 119.4 . . ? 
C113 C145 C85 122.0(9) . . ? 
C113 C145 H14D 119.0 . . ? 
C85 C145 H14D 119.0 . . ? 
C122 C146 C42 121.5(11) . . ? 
C122 C146 H14E 119.2 . . ? 
C42 C146 H14E 119.2 . . ? 
Cl3U C1U Cl1U 111.2(3) . . ? 
Cl3U C1U Cl2U 111.2(3) . . ? 
Cl1U C1U Cl2U 111.2(3) . . ? 
Cl3U C1U H1UA 107.7 . . ? 
Cl1U C1U H1UA 107.7 . . ? 
Cl2U C1U H1UA 107.7 . . ? 
Cl3V C1V Cl2V 111.2(3) . . ? 
Cl3V C1V Cl1V 111.2(3) . . ? 
Cl2V C1V Cl1V 111.2(3) . . ? 
Cl3V C1V H1VA 107.7 . . ? 
Cl2V C1V H1VA 107.7 . . ? 
Cl1V C1V H1VA 107.7 . . ? 
Cl2T C1T Cl1T 111.2(3) . . ? 
Cl2T C1T Cl3T 111.2(3) . . ? 
Cl1T C1T Cl3T 111.2(3) . . ? 
Cl2T C1T H1TA 107.7 . . ? 
Cl1T C1T H1TA 107.7 . . ? 
Cl3T C1T H1TA 107.7 . . ? 
Cl1W C1W Cl3W 111.2(3) . . ? 
Cl1W C1W Cl2W 111.2(3) . . ? 
Cl3W C1W Cl2W 111.2(3) . . ? 
Cl1W C1W H1WA 107.7 . . ? 
Cl3W C1W H1WA 107.7 . . ? 
Cl2W C1W H1WA 107.7 . . ? 
Ru2 Cl1C Ag1 124.07(7) . . ? 
Ru3 Cl2C Ag1 129.24(8) . . ? 
C17 N1 Ru2 114.2(4) . . ? 
C17 N1 H1A 108.7 . . ? 
Ru2 N1 H1A 108.7 . . ? 
C17 N1 H1B 108.7 . . ? 
Ru2 N1 H1B 108.7 . . ? 
H1A N1 H1B 107.6 . . ? 
C40 N2 Ru2 106.8(4) . . ? 
C40 N2 H2A 110.4 . . ? 
Ru2 N2 H2A 110.4 . . ? 
C40 N2 H2B 110.4 . . ? 
Ru2 N2 H2B 110.4 . . ? 
H2A N2 H2B 108.6 . . ? 
C28 N3 Ru3 115.0(4) . . ? 
C28 N3 H3A 108.5 . . ? 
Ru3 N3 H3A 108.5 . . ? 
C28 N3 H3B 108.5 . . ? 
Ru3 N3 H3B 108.5 . . ? 
H3A N3 H3B 107.5 . . ? 
C76 N4 Ru3 108.0(4) . . ? 
C76 N4 H4A 110.1 . . ? 
Ru3 N4 H4A 110.1 . . ? 
C76 N4 H4B 110.1 . . ? 
Ru3 N4 H4B 110.1 . . ? 
H4A N4 H4B 108.4 . . ? 
S1 O1 Ag1 98.2(3) . . ? 
S2 O4 Ag1 103.2(2) . . ? 
C16 O7 Ru2 76.9(4) . . ? 
C18 O8 Ru3 76.5(4) . . ? 
C50 P1 C34 108.5(4) . . ? 
C50 P1 C55 100.0(4) . . ? 
C34 P1 C55 104.6(4) . . ? 
C50 P1 Ru2 105.6(3) . . ? 
C34 P1 Ru2 121.7(2) . . ? 
C55 P1 Ru2 114.3(2) . . ? 
C27 P2 C20 110.5(4) . . ? 
C27 P2 C53 101.6(4) . . ? 
C20 P2 C53 100.9(4) . . ? 
C27 P2 Ru2 119.2(2) . . ? 
C20 P2 Ru2 101.1(3) . . ? 
C53 P2 Ru2 121.9(2) . . ? 
C47 P3 C37 103.8(4) . . ? 
C47 P3 C100 107.4(4) . . ? 
C37 P3 C100 100.9(3) . . ? 
C47 P3 Ru3 100.6(2) . . ? 
C37 P3 Ru3 121.1(2) . . ? 
C100 P3 Ru3 121.3(2) . . ? 
C140 P4 C7 103.6(4) . . ? 
C140 P4 C64 110.1(4) . . ? 
C7 P4 C64 100.3(4) . . ? 
C140 P4 Ru3 104.2(3) . . ? 
C7 P4 Ru3 106.5(3) . . ? 
C64 P4 Ru3 129.3(3) . . ? 
O7 Ru2 N1 79.4(2) . . ? 
O7 Ru2 C16 35.5(3) . . ? 
N1 Ru2 C16 114.6(3) . . ? 
O7 Ru2 N2 86.3(2) . . ? 
N1 Ru2 N2 78.0(2) . . ? 
C16 Ru2 N2 98.1(3) . . ? 
O7 Ru2 P1 87.37(15) . . ? 
N1 Ru2 P1 90.79(18) . . ? 
C16 Ru2 P1 82.4(2) . . ? 
N2 Ru2 P1 167.97(16) . . ? 
O7 Ru2 P2 108.58(16) . . ? 
N1 Ru2 P2 166.70(18) . . ? 
C16 Ru2 P2 74.9(2) . . ? 
N2 Ru2 P2 91.69(16) . . ? 
P1 Ru2 P2 100.02(6) . . ? 
O7 Ru2 Cl1C 167.78(15) . . ? 
N1 Ru2 Cl1C 88.41(17) . . ? 
C16 Ru2 Cl1C 156.7(2) . . ? 
N2 Ru2 Cl1C 90.11(17) . . ? 
P1 Ru2 Cl1C 93.97(6) . . ? 
P2 Ru2 Cl1C 83.17(6) . . ? 
O8 Ru3 N3 78.9(2) . . ? 
O8 Ru3 C18 36.1(2) . . ? 
N3 Ru3 C18 114.9(3) . . ? 
O8 Ru3 N4 85.7(2) . . ? 
N3 Ru3 N4 78.0(2) . . ? 
C18 Ru3 N4 96.4(3) . . ? 
O8 Ru3 P4 84.25(18) . . ? 
N3 Ru3 P4 90.70(16) . . ? 
C18 Ru3 P4 81.0(3) . . ? 
N4 Ru3 P4 166.11(18) . . ? 
O8 Ru3 P3 107.66(15) . . ? 
N3 Ru3 P3 166.42(17) . . ? 
C18 Ru3 P3 73.1(2) . . ? 
N4 Ru3 P3 90.51(18) . . ? 
P4 Ru3 P3 101.65(7) . . ? 
O8 Ru3 Cl2C 165.75(16) . . ? 
N3 Ru3 Cl2C 86.84(18) . . ? 
C18 Ru3 Cl2C 158.1(2) . . ? 
N4 Ru3 Cl2C 90.62(17) . . ? 
P4 Ru3 Cl2C 96.81(7) . . ? 
P3 Ru3 Cl2C 86.11(6) . . ? 
O2 S1 O3 114.52(11) . . ? 
O2 S1 O1 114.49(11) . . ? 
O3 S1 O1 114.48(11) . . ? 
O2 S1 C61 104.0(3) . . ? 
O3 S1 C61 105.5(3) . . ? 
O1 S1 C61 101.9(3) . . ? 
O6 S2 O5 114.59(11) . . ? 
O6 S2 O4 114.57(11) . . ? 
O5 S2 O4 114.56(11) . . ? 
O6 S2 C75 103.2(3) . . ? 
O5 S2 C75 104.1(3) . . ? 
O4 S2 C75 103.8(3) . . ? 
S1G S1G O1G 78.9(6) 2_565 2_565 ? 
S1G S1G O1G 56.7(6) 2_565 . ? 
O1G S1G O1G 96.2(12) 2_565 . ? 
S1G S1G O2G 95.1(6) 2_565 . ? 
O1G S1G O2G 19.6(10) 2_565 . ? 
O1G S1G O2G 114.56(12) . . ? 
S1G S1G O3G 148.5(6) 2_565 . ? 
O1G S1G O3G 132.2(7) 2_565 . ? 
O1G S1G O3G 114.55(12) . . ? 
O2G S1G O3G 114.55(12) . . ? 
S1G S1G C1G 89.7(4) 2_565 2_565 ? 
O1G S1G C1G 137.4(8) 2_565 2_565 ? 
O1G S1G C1G 111.4(8) . 2_565 ? 
O2G S1G C1G 127.6(8) . 2_565 ? 
O3G S1G C1G 64.4(7) . 2_565 ? 
S1G S1G F3G 134.1(4) 2_565 2_565 ? 
O1G S1G F3G 141.1(9) 2_565 2_565 ? 
O1G S1G F3G 118.3(8) . 2_565 ? 
O2G S1G F3G 121.6(7) . 2_565 ? 
O3G S1G F3G 17.3(6) . 2_565 ? 
C1G S1G F3G 47.1(3) 2_565 2_565 ? 
S1G S1G C1G 55.9(3) 2_565 . ? 
O1G S1G C1G 104.5(7) 2_565 . ? 
O1G S1G C1G 102.3(7) . . ? 
O2G S1G C1G 105.4(7) . . ? 
O3G S1G C1G 103.5(6) . . ? 
C1G S1G C1G 39.8(6) 2_565 . ? 
F3G S1G C1G 86.2(5) 2_565 . ? 
S1G S1G O2G 51.1(4) 2_565 2_565 ? 
O1G S1G O2G 102.4(6) 2_565 2_565 ? 
O1G S1G O2G 10.5(11) . 2_565 ? 
O2G S1G O2G 121.6(10) . 2_565 ? 
O3G S1G O2G 114.2(6) . 2_565 ? 
C1G S1G O2G 101.5(6) 2_565 2_565 ? 
F3G S1G O2G 114.5(7) 2_565 2_565 ? 
C1G S1G O2G 92.5(5) . 2_565 ? 
O2G O1G S1G 105(2) 2_565 2_565 ? 
O2G O1G S1G 138(3) 2_565 . ? 
S1G O1G S1G 44.5(4) 2_565 . ? 
O1G O2G S1G 55.3(16) 2_565 . ? 
O1G O2G S1G 32(2) 2_565 2_565 ? 
S1G O2G S1G 33.8(3) . 2_565 ? 
F3G O3G S1G 113.6(17) 2_565 . ? 
F3G O3G C1G 53.8(15) 2_565 2_565 ? 
S1G O3G C1G 59.9(4) . 2_565 ? 
C1G C1G F2G 94.5(10) 2_565 . ? 
C1G C1G F3G 156.9(8) 2_565 . ? 
F2G C1G F3G 107.9(3) . . ? 
C1G C1G F1G 68.9(9) 2_565 . ? 
F2G C1G F1G 107.9(3) . . ? 
F3G C1G F1G 107.9(3) . . ? 
C1G C1G F1G 60.4(6) 2_565 2_565 ? 
F2G C1G F1G 34.6(7) . 2_565 ? 
F3G C1G F1G 142.4(8) . 2_565 ? 
F1G C1G F1G 88.8(10) . 2_565 ? 
C1G C1G S1G 84.6(4) 2_565 2_565 ? 
F2G C1G S1G 133.2(8) . 2_565 ? 
F3G C1G S1G 76.0(8) . 2_565 ? 
F1G C1G S1G 115.1(8) . 2_565 ? 
F1G C1G S1G 127.7(8) 2_565 2_565 ? 
C1G C1G O3G 138.9(6) 2_565 2_565 ? 
F2G C1G O3G 119.5(8) . 2_565 ? 
F3G C1G O3G 20.3(6) . 2_565 ? 
F1G C1G O3G 115.6(8) . 2_565 ? 
F1G C1G O3G 152.2(11) 2_565 2_565 ? 
S1G C1G O3G 55.7(4) 2_565 2_565 ? 
C1G C1G S1G 55.6(3) 2_565 . ? 
F2G C1G S1G 111.5(7) . . ? 
F3G C1G S1G 108.9(7) . . ? 
F1G C1G S1G 112.4(8) . . ? 
F1G C1G S1G 94.3(7) 2_565 . ? 
S1G C1G S1G 34.4(3) 2_565 . ? 
O3G C1G S1G 88.8(5) 2_565 . ? 
C1G C1G F2G 45.9(6) 2_565 2_565 ? 
F2G C1G F2G 110.1(8) . 2_565 ? 
F3G C1G F2G 126.3(6) . 2_565 ? 
F1G C1G F2G 23.7(6) . 2_565 ? 
F1G C1G F2G 81.0(6) 2_565 2_565 ? 
S1G C1G F2G 102.4(7) 2_565 2_565 ? 
O3G C1G F2G 126.7(9) 2_565 2_565 ? 
S1G C1G F2G 90.6(6) . 2_565 ? 
F2G F1G C1G 116.0(14) 2_565 . ? 
F2G F1G C1G 66.2(9) 2_565 2_565 ? 
C1G F1G C1G 50.6(8) . 2_565 ? 
F1G F2G C1G 79.1(12) 2_565 . ? 
F1G F2G C1G 40.3(10) 2_565 2_565 ? 
C1G F2G C1G 39.6(6) . 2_565 ? 
O3G F3G C1G 105.9(18) 2_565 . ? 
O3G F3G S1G 49.1(13) 2_565 2_565 ? 
C1G F3G S1G 56.9(6) . 2_565 ? 
Cl3X C1X Cl2X 111.2(3) . . ? 
Cl3X C1X Cl1X 111.2(3) . . ? 
Cl2X C1X Cl1X 111.2(3) . . ? 
Cl3X C1X H1XA 107.7 . . ? 
Cl2X C1X H1XA 107.7 . . ? 
Cl1X C1X H1XA 107.7 . . ? 
Cl3X Cl1X C1X 54.6(15) 2_665 . ? 
Cl3X Cl1X C1X 59(3) 2_665 2_665 ? 
C1X Cl1X C1X 32.5(9) . 2_665 ? 
Cl2X Cl2X C1X 0(10) 2_665 . ? 
Cl2X Cl2X C1X 0(10) 2_665 2_665 ? 
C1X Cl2X C1X 34.4(11) . 2_665 ? 
Cl1X Cl3X C1X 115(2) 2_665 2_665 ? 
Cl1X Cl3X C1X 111(2) 2_665 . ? 
C1X Cl3X C1X 35.8(11) 2_665 . ? 
  
_diffrn_measured_fraction_theta_max    0.992 
_diffrn_reflns_theta_full              27.93 
_diffrn_measured_fraction_theta_full   0.992 
_refine_diff_density_max   10.390 
_refine_diff_density_min   -1.310 
_refine_diff_density_rms    0.209 
